# Supplementary material for: Novel Janus diamane C4FCl: a stable and moderate bandgap semiconductor with a huge excitonic effect
Source: Royal Society of Chemistry journal article supplement (doi:10.1039/d1cp02632a), 2021-01-01
Supplement: d1cp02632a1.pdf [file d1cp02632a1.pdf]

## Supporting Information

### Novel Janus diamane $C_4FCI$ : a stable and moderate bandgap semiconductor with huge excitonic effects

Huabing Shu\*

*School of Science, Jiangsu University of Science and Technology, Zhenjiang 212001,  
China*

E-mail: [shuhuabing@just.edu.cn](mailto:shuhuabing@just.edu.cn)

#### AB-stacked bilayer graphene

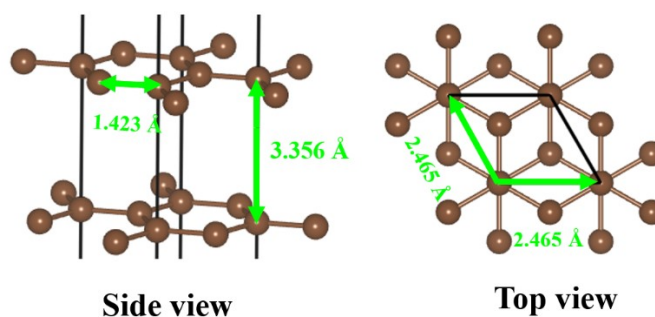

**Fig. S1** Optimized structure of bilayer graphene with AB-stacked configuration.

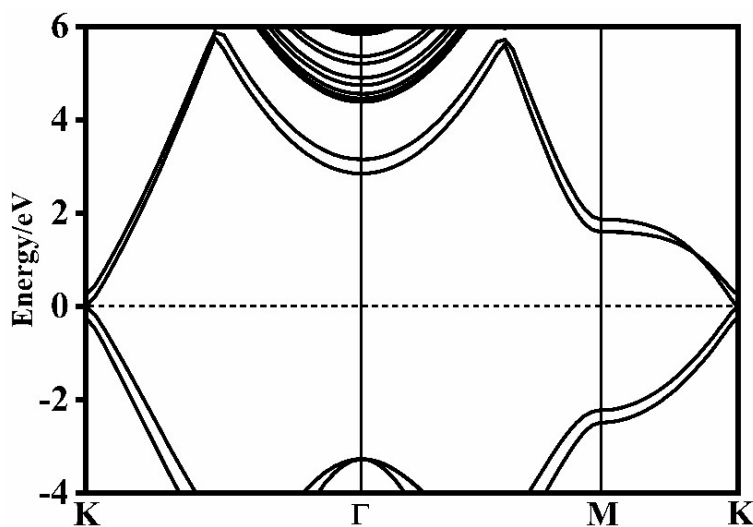

**Fig. S2** Band structure of bilayer graphene with AB-stacked configuration at the PBE level.
